# Supplementary material for: Combined Cancer Photothermal-Chemotherapy Based on Doxorubicin/Gold Nanorod-Loaded Polymersomes
Source: PubMed Central journal article supplement — Theranostics. 2015 Jan 20;5(4):345–56. doi: 10.7150/thno.10731 (PMC4329499; doi:10.7150/thno.10731), 2015-01-20
Supplement: thnov05p0345s1.pdf [file thnov05p0345s1.pdf]

# Supplementary Information

## Combined Cancer Photothermal-Chemotherapy Based on Doxorubicin/Gold Nanorod-Loaded Polymersomes

JinFeng Liao<sup>1</sup>, WenTing Li<sup>1</sup>, JinRong Peng<sup>1</sup>, Qian Yang<sup>1,2</sup>, He Li<sup>2</sup>, YuQuan Wei<sup>1</sup>, XiaoNing Zhang<sup>3</sup>, ZhiYong Qian<sup>1,\*</sup>

<sup>1</sup> State Key Laboratory of Biotherapy/Collaborative Innovation Center for Biotherapy, West China Hospital, Sichuan University, Chengdu, 610041, P.R. China

<sup>2</sup> School of Medical and Life Sciences, University of Jinan, Jinan 250022, PR China

<sup>3</sup> School of Medicine, Tsinghua University, Beijing, 100084, China

Address correspondence to ZhiYong Qian, Sichuan University, [anderson-qian@163.com](mailto:anderson-qian@163.com), [zhiyongqian@scu.edu.cn](mailto:zhiyongqian@scu.edu.cn); Tel/Fax: +86-28-85501986

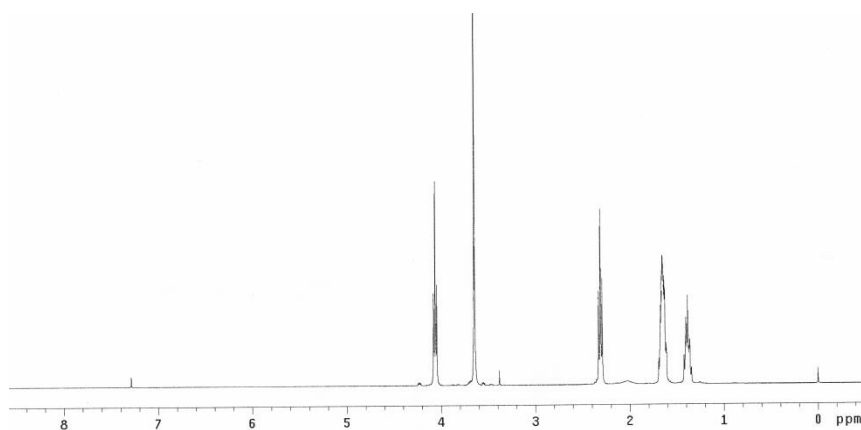

**Figure S1.** the <sup>1</sup>H-NMR spectra of mPEG-PCL copolymer.

---

\* To whom should be corresponded (Qian ZY), Tel: +86-28-85164063, Fax: +86-28-85164060, E-mail: [anderson-qian@163.com](mailto:anderson-qian@163.com) or [zhiyongqian@scu.edu.cn](mailto:zhiyongqian@scu.edu.cn).
